# Supplementary material for: Cell division cycle associated 2 (CDCA2) upregulation promotes the progression of hepatocellular carcinoma in a p53-dependant manner
Source: PeerJ. 2022 Jun 6;10:e13535. doi: 10.7717/peerj.13535 (PMC9179591; doi:10.7717/peerj.13535)
Supplement: Table S2 [file peerj-10-13535-s004.xls]

## Sheet: Sheet1 (2)
No.	Gender	Age (yrs)	Maximum diameter (cm)	Stage	Tumor Grade	Gly-3	CDCA2 expression
1	Male	50	3.5	I	G4	-	L
2	Male	52	3	II	G2	-	L
3	Male	47	2.5	III	G3	-	L
4	Female	60	11	III	G3	+	H
5	Male	59	3.3	III	G3	+	H
6	Male	58	3.6	II	G1	+	L
7	Male	59	4	II	G3	-	L
8	Male	60	7.5	II	G2	-	L
9	Male	70	4	II	G1	+	H
10	Male	56	4.5	III	G2	+	L
11	Male	59	5.5	II	G3	+	H
12	Male	65	7.5	III	G3	-	H
13	Male	35	3.5	III	G2	-	L
14	Male	53	4.5	II	G1	+	H
15	Male	63	5.3	III	G2	-	H
16	Male	57	2	II	G3	-	H
17	Male	47	2.5	II	G3	-	H
18	Female	54	1	I	G3	+	H
19	Male	52	12	III	G3	-	L
20	Male	39	13	III	G2	-	L
21	Female	46	5.2	II	G3	-	H
22	Male	45	3	II	G1	-	L
23	Female	60	4.8	III	G2	+	H
24	Male	52	2.7	I	G3	+	L
25	Female	57	4	I	G1	-	L
26	Male	60	3.5	I	G3	-	L
27	Male	50	1.8	III	G3	-	L
28	Male	47	13	II	G3	-	L
29	Male	72	4.5	III	G1	-	L
30	Male	45	3.2	III	G2	-	L
31	Male	59	4	II	G3	-	H
32	Male	58	3.2	II	G3	-	L
33	Male	49	9	III	G2	-	L
34	Male	75	0.5	I	G3	-	L
35	Male	41	16	III	G2	-	H
36	Male	35	9	II	G2	-	L
37	Male	69	5	II	G1	+	H
38	Male	55	15	III	G3	-	H
39	Female	46	5.3	II	G3	+	H
40	Male	64	4	III	G3	-	H
41	Male	44	3	III	G1	-	L
42	Male	50	0.8	II	G2	-	L
43	Male	65	5.5	III	G2	+	H
44	Female	69	3.5	II	G2	-	L
45	Female	68	0.5	I	G3	-	H
46	Male	45	0.2	II	G3	-	H
47	Male	45	4.4	II	G1	+	L
48	Female	61	8	II	G2	-	L
*H: high CDCA2 expression, L: low CDCA2 expression

## Sheet: Sheet2
H
H
H
H
H
H
H
H
H
L
L
L
L
L
L
L
L
L
L
